# Supplementary material
Source: PubMed Central journal article supplement (PMC1637569)

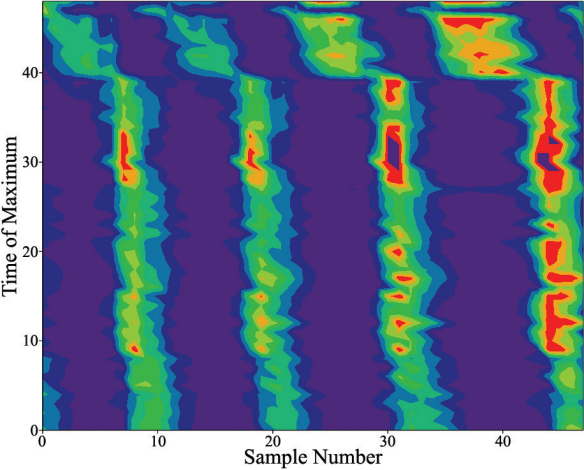

Supplement: pnas_0604860103_10.pdf [file pnas_0604860103_10.pdf]

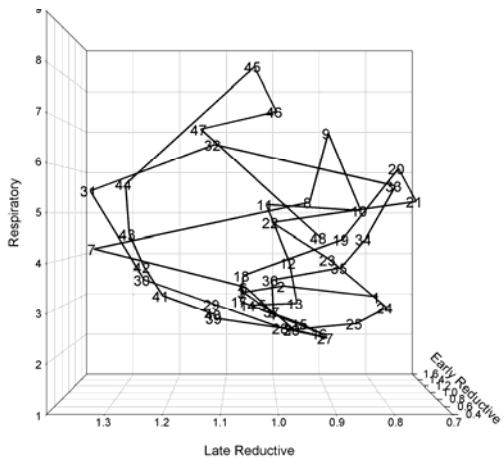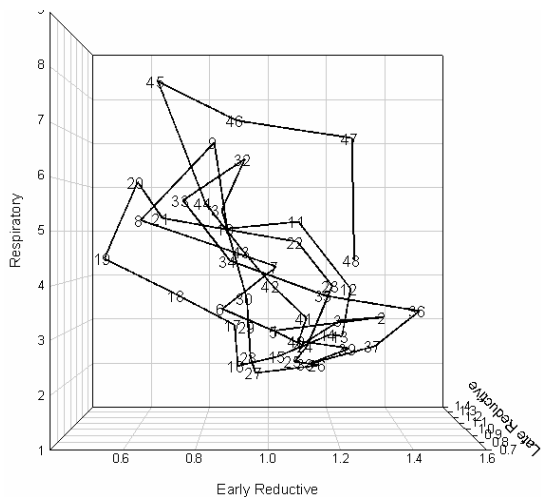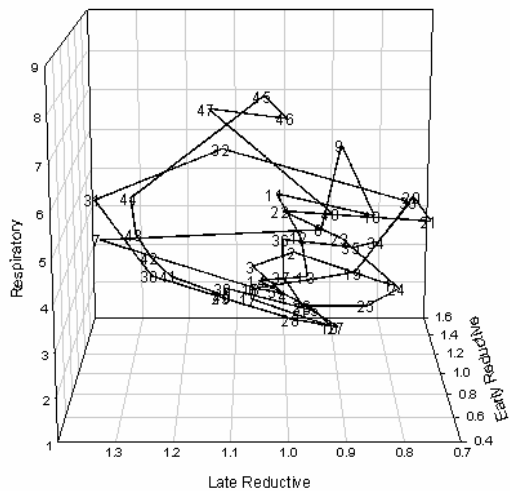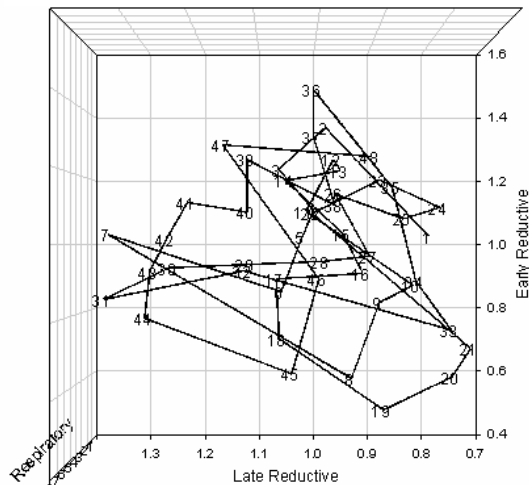

Supplement: pnas_0604860103_7.pdf [file pnas_0604860103_7.pdf]
